# Supplementary material for: Extraordinary thermal behavior of graphene oxide in air for electrode applications
Source: Royal Society of Chemistry journal article supplement (doi:10.1039/d0na00805b), 2021-01-01
Supplement: d0na00805b1.pdf [file d0na00805b1.pdf]

## Supplementary Information

# Extraordinary thermal behavior of graphene oxide in air for electrode applications

*Joon Young Cho<sup>1,2</sup>, Jung Hoon Kim<sup>1</sup> and Joong Tark Han<sup>1,2,\*</sup>*

<sup>1</sup>Nano Hybrid Technology Research Center, Korea Electrotechnology Research Institute  
(KERI), Changwon 51543, Republic of Korea

<sup>2</sup>Department of Electro-Functionality Material Engineering, University of Science and  
Technology (UST), Changwon 51543, Republic of Korea

\*Corresponding authors. E-mail: [jthan@keri.re.kr](mailto:jthan@keri.re.kr)

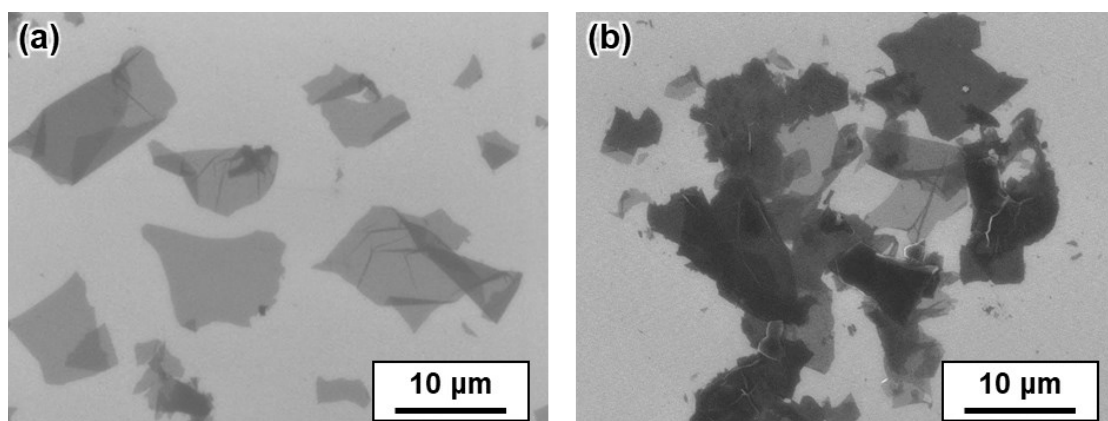

**Figure S1.** FE-SEM images of exfoliated GPO2 in (a) KOH and (b) NH<sub>4</sub>OH by using homogenizer at 10000 rpm for 1 h.

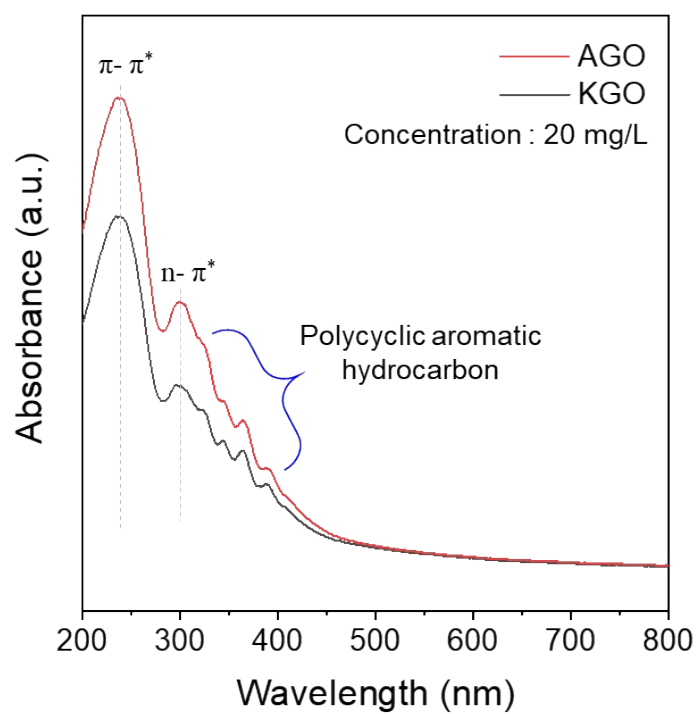

**Figure S2.** UV-Vis spectrum of AGO and KGO.

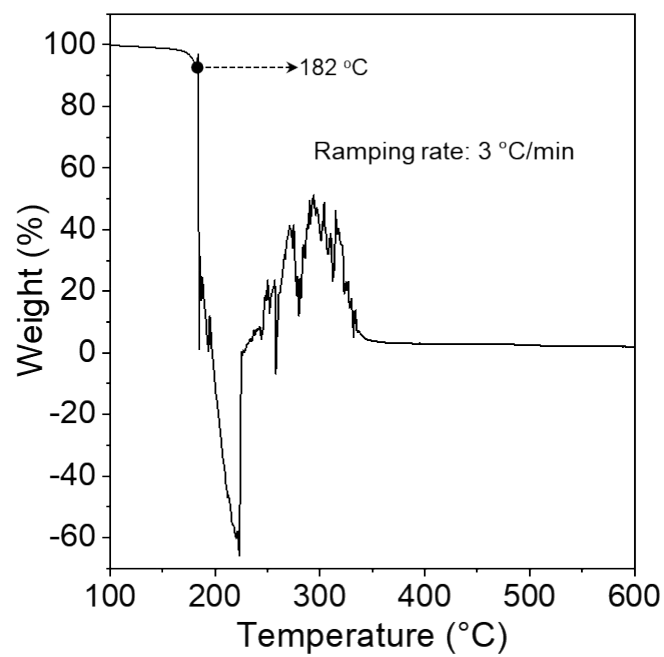

**Figure S3.** TGA thermogram of AGO at a ramping rate of 3°C/min.

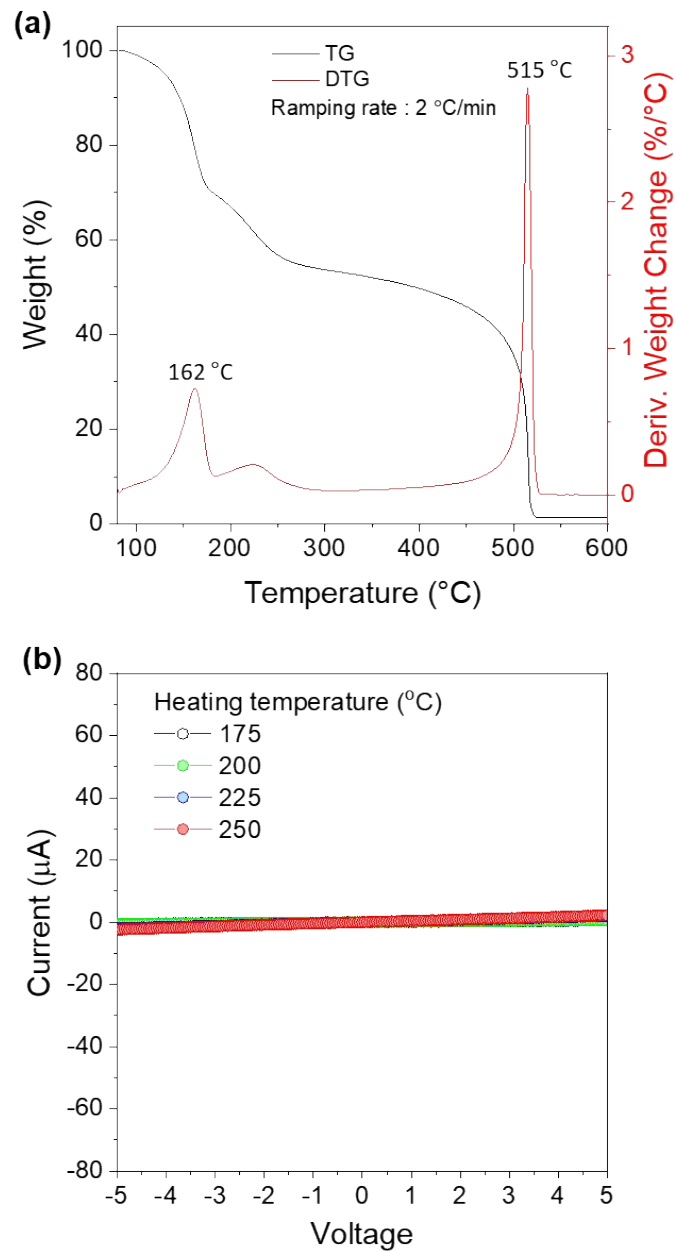

**Figure S4.** (a) TGA thermogram and of HGO synthesized by  $\text{KMnO}_4$ -based oxidation at ramping rate of  $2\text{ }^\circ\text{C}/\text{min}$ , (b) I-V plots of HGO films after thermal treatment in air for 1 h.

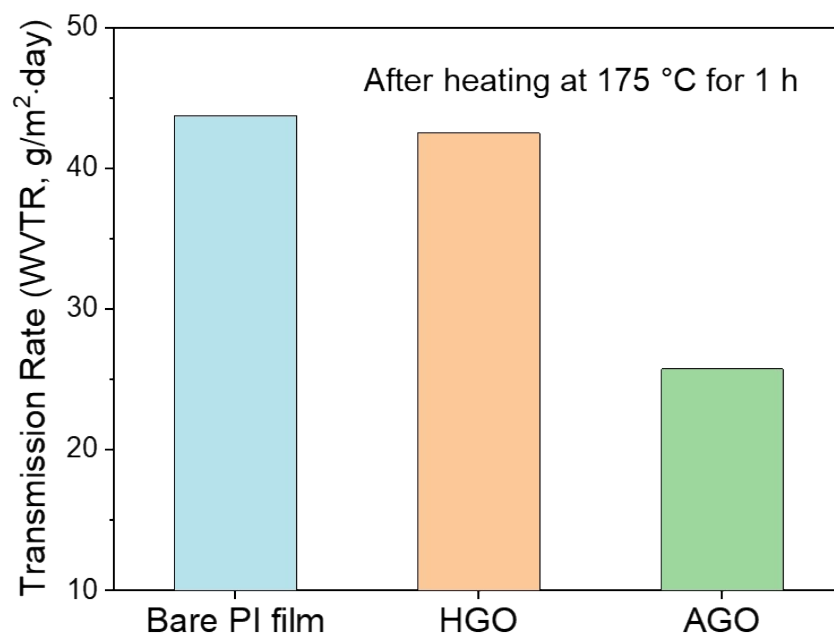

**Figure S5.** Water vapor transmission rate of bare PI film and PI films coated with HGO and AGO followed by thermal treatment at 175°C for 1h.
